# Supplementary material
Source: PubMed Central journal article supplement (PMC3021128)
Supplement: NIHMS253693-supplement-01.pdf [file NIHMS253693-supplement-01.pdf]

Molecular Cell, Volume 40

Supplemental Information

Mec1 Is One of Multiple Kinases that Prime

the Mcm2-7 Helicase for Phosphorylation by Cdc7

John C.W. Randell, Andy Fan, Clara Chan, Laura I. Francis, Ryan C. Heller, Kyriaki Galani, and Stephen P. Bell

### **Supplemental Experimental Procedures**

#### *Construction of S. cerevisiae MCM4 and MCM6 mutant strains*

To integrate *MCM4* and *MCM6* mutant alleles at their chromosomal locus, we first created plasmids containing the *MCM4* or *MCM6* promoter upstream of a NatMX4 (for *MCM4*) or *LEU2* (for *MCM6*) marker cassette, with the Mcm5 promoter driving expression of the *MCM4* or *MCM6* gene downstream of the marker and Pac1 sites flanking the entire construct. A unique *Bst*BI site was inserted downstream of the N-terminal mutations to allow confirmation of the presence of the mutant allele after integration *in vivo*. Proper integration was confirmed by PCR followed by *Bst*BI digestion or sequencing to confirm the presence of all mutations in each allele.

To create strains carrying mutations in both *MCM4* and *MCM6*, we began with strains carrying the wild-type and mutant copies of *MCM4* on URA<sup>+</sup> and TRP<sup>+</sup> *ARS/CEN* constructs, respectively. *MCM6* alleles were incorporated into these strains using the LEU<sup>+</sup> integrating constructs described above. Proliferation of *mcm4 mcm6* double-mutant strains was then analyzed by spotting assay using FOA counter-selection against the URA<sup>+</sup> wild-type *MCM4* construct. A complete list of the strains used in this study can be found in Table S2.

Analysis of *cdc7-4* bypass alleles was performed by transforming the *cdc7-4* strain OAy711 with PacI-digested *MCM4* integrating constructs carrying phosphomimetic aspartate mutations in *MCM4*.

Gene deletions were performed using standard PCR-based gene disruption techniques (Petracek and Longtine, 2002). FACS and chromatin fractionation assays were performed as described (Wilmes et al., 2004).

#### *Cell cycle arrest experiments*

Strains were grown in YPD at 25°C to early log-phase. At 0.2 OD<sub>600</sub>/mL, cells were treated with  $\alpha$ -factor until reaching full G1 arrest (approx. 3 hrs). Cells were released from G1 block by washing twice with 20 mL water and resuspending the pellet in YPD with 50  $\mu$ g/mL pronase (Sigma). Divergent cell-cycle release conditions at 25°C were made by aliquoting 10 mL of resulting cultures for hydroxyurea block (200 mM final), nocodazole block (10  $\mu$ g/mL final), and using the remaining G1-released cultures for S-phase cell isolation. Cell-cycle arrest and/or progressions were monitored by FACS and budding and 5 mL of cultures were taken per time-point for TCA precipitation.

The preparation of the *cdc7-4* and *cdc4-1* temperature sensitive strains was as above except that after  $\alpha$ -factor arrest, cells were shifted to 37°C for 1 hr to inactivate Cdc4 and Cdc7 prior to  $\alpha$ -factor release. Inactivation of *cdc4-1* or *cdc7-1* during S-phase release or in HU-blocked cells was initiated by resuspending the washed cell pellet with pre-warmed 37°C YPD with pronase (with or without HU).

# Randell et al., Figure S1, related to Figure 1

**MCM2**

WT 1 MS0NRRRRREEDDS0SENELEPPSSRQQHFRGGWVPSSTGSP...SLSE...SDDDLSPMDIDPLREELTLESLSNWKANSYSEWIT0PNVSRITARELKSFLLEYTD 220

MCM4 MS0NRRRRREEDDS0SENELEPPSSRQQHFRGGWVPSSTGSP...SLSE...SDDDLSPMDIDPLREELTLESLSNWKANSYSEWIT0PNVSRITARELKSFLLEYTD

AP (3) MS0NRRRRREEDDS0SENELEPPSSRQQHFRGGWVPSSTGSP...SLSE...SDDDLSPMDIDPLREELTLESLSNWKANSYSEWIT0PNVSRITARELKSFLLEYTD

AP + AQ (4) MS0NRRRRREEDDS0SENELEPPSSRQQHFRGGWVPSSTGSP...SLSE...SDDDLSPMDIDPLREELTLESLSNWKANSYSEWIT0PNVSRITARELKSFLLEYTD

CK2 (4) MS0NRRRRREEDDS0SENELEPPSSRQQHFRGGWVPSSTGSP...SLSE...SDDDLSPMDIDPLREELTLESLSNWKANSYSEWIT0PNVSRITARELKSFLLEYTD

AD/E (4) MS0NRRRRREEDDS0SENELEPPSSRQQHFRGGWVPSSTGSP...SLSE...SDDDLSPMDIDPLREELTLESLSNWKANSYSEWIT0PNVSRITARELKSFLLEYTD

AD/E+ASPIQ (6) MS0NRRRRREEDDS0SENELEPPSSRQQHFRGGWVPSSTGSP...SLSE...SDDDLSPMDIDPLREELTLESLSNWKANSYSEWIT0PNVSRITARELKSFLLEYTD

14A MS0NRRRRREEDDS0SENELEPPSSRQQHFRGGWVPSSTGSP...SLSE...SDDDLSPMDIDPLREELTLESLSNWKANSYSEWIT0PNVSRITARELKSFLLEYTD

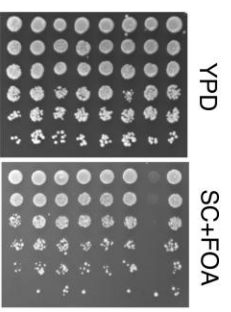

**MCM4**

WT 1 MS0QSSSPFTKEDNNESSP...SSPALFYSSSSSQ...SNLSQ...SAPLNFPSSSQRONS0DVF0SQ0GRGRIHSSASASGRSRYHSDLR0RALPTSSSSL...TS0LSSP...TSSSSAPPSEASE 175

MCM6 MS0QSSSPFTKEDNNESSP...SSPALFYSSSSSQ...SNLSQ...SAPLNFPSSSQRONS0DVF0SQ0GRGRIHSSASASGRSRYHSDLR0RALPTSSSSL...TS0LSSP...TSSSSAPPSEASE

AP (5) MS0QSSSPFTKEDNNESSP...SSPALFYSSSSSQ...SNLSQ...SAPLNFPS...AQONS0DVF0AQ0GRGRIHSSASASGRSRYHSDLR0RALPTSSSSL...TS0LSSP...TSSSSAPPSEASE

AQ (6) MS0QSSSPFTKEDNNESSP...SSPALFYSSSSSQ...SNLSQ...SAPLNFPS...AQONS0DVF0AQ0GRGRIHSSASASGRSRYHSDLR0RALPTSSSSL...TS0LSSP...TSSSSAPPSEASE

AP + AQ (11) MS0QSSSPFTKEDNNESSP...SSPALFYSSSSSQ...SNLSQ...SAPLNFPS...AQONS0DVF0AQ0GRGRIHSSASASGRSRYHSDLR0RALPTSSSSL...TS0LSSP...TSSSSAPPSEASE

AD/E (7) MS0QSSSPFTKEDNNESSP...SSPALFYSSSSSQ...SNLSQ...SAPLNFPS...AQONS0DVF0AQ0GRGRIHSSASASGRSRYHSDLR0RALPTSSSSL...TS0LSSP...TSSSSAPPSEASE

AD/E+ASPIQ (14) MS0QSSSPFTKEDNNESSP...SSPALFYSSSSSQ...SNLSQ...SAPLNFPS...AQONS0DVF0AQ0GRGRIHSSASASGRSRYHSDLR0RALPTSSSSL...TS0LSSP...TSSSSAPPSEASE

25A MS0QSSSPFTKEDNNESSP...SSPALFYSSSSSQ...SNLSQ...SAPLNFPS...AQONS0DVF0AQ0GRGRIHSSASASGRSRYHSDLR0RALPTSSSSL...TS0LSSP...TSSSSAPPSEASE

43A MS0QSSSPFTKEDNNESSP...SSPALFYSSSSSQ...SNLSQ...SAPLNFPS...AQONS0DVF0AQ0GRGRIHSSASASGRSRYHSDLR0RALPTSSSSL...TS0LSSP...TSSSSAPPSEASE

ASPIQ (7) MS0QSSSPFTKEDNNESSP...SSPALFYSSSSSQ...SNLSQ...SAPLNFPS...AQONS0DVF0AQ0GRGRIHSSASASGRSRYHSDLR0RALPTSSSSL...TS0LSSP...TSSSSAPPSEASE

DP + DQ (11) MS0QSSSPFTKEDNNESSP...SSPALFYSSSSSQ...SNLSQ...SAPLNFPS...AQONS0DVF0AQ0GRGRIHSSASASGRSRYHSDLR0RALPTSSSSL...TS0LSSP...TSSSSAPPSEASE

DD/E (7) MS0QSSSPFTKEDNNESSP...SSPALFYSSSSSQ...SNLSQ...SAPLNFPS...AQONS0DVF0AQ0GRGRIHSSASASGRSRYHSDLR0RALPTSSSSL...TS0LSSP...TSSSSAPPSEASE

DSP/Q (7) MS0QSSSPFTKEDNNESSP...SSPALFYSSSSSQ...SNLSQ...SAPLNFPS...AQONS0DVF0AQ0GRGRIHSSASASGRSRYHSDLR0RALPTSSSSL...TS0LSSP...TSSSSAPPSEASE

DD/E+DSP/Q (14) MS0QSSSPFTKEDNNESSP...SSPALFYSSSSSQ...SNLSQ...SAPLNFPS...AQONS0DVF0AQ0GRGRIHSSASASGRSRYHSDLR0RALPTSSSSL...TS0LSSP...TSSSSAPPSEASE

DAF + DAQ + DD/E (25) MS0QSSSPFTKEDNNESSP...SSPALFYSSSSSQ...SNLSQ...SAPLNFPS...AQONS0DVF0AQ0GRGRIHSSASASGRSRYHSDLR0RALPTSSSSL...TS0LSSP...TSSSSAPPSEASE

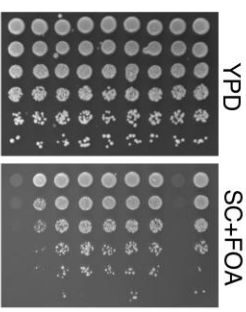

**MCM6**

WT 1 MS0FPADTSSNRPSNSPSPSSIDAGFGSSSGLDLQIGSRHLHFPSSSQPHVNSQGTGFPVNDSTGTSSQRLQTDGSA1NDNMGNEPARSFRKR...TGEKVEAFEQLEDFSVQSDTDTG 130

MCM2 MS0FPADTSSNRPSNSPSPSSIDAGFGSSSGLDLQIGSRHLHFPSSSQPHVNSQGTGFPVNDSTGTSSQRLQTDGSA1NDNMGNEPARSFRKR...TGEKVEAFEQLEDFSVQSDTDTG

AP (3) MS0FPADTSSNRPSNSPSPSSIDAGFGSSSGLDLQIGSRHLHFPSSSQPHVNSQGTGFPVNDSTGTSSQRLQTDGSA1NDNMGNEPARSFRKR...TGEKVEAFEQLEDFSVQSDTDTG

AQ (3) MS0FPADTSSNRPSNSPSPSSIDAGFGSSSGLDLQIGSRHLHFPSSSQPHVNSQGTGFPVNDSTGTSSQRLQTDGSA1NDNMGNEPARSFRKR...TGEKVEAFEQLEDFSVQSDTDTG

AQ+AA8+8 (17) MS0FPADTSSNRPSNSPSPSSIDAGFGSSSGLDLQIGSRHLHFPSSSQPHVNSQGTGFPVNDSTGTSSQRLQTDGSA1NDNMGNEPARSFRKR...TGEKVEAFEQLEDFSVQSDTDTG

AP+AAQ+AA+10 (22) MS0FPADTSSNRPSNSPSPSSIDAGFGSSSGLDLQIGSRHLHFPSSSQPHVNSQGTGFPVNDSTGTSSQRLQTDGSA1NDNMGNEPARSFRKR...TGEKVEAFEQLEDFSVQSDTDTG

AD/E (3) MS0FPADTSSNRPSNSPSPSSIDAGFGSSSGLDLQIGSRHLHFPSSSQPHVNSQGTGFPVNDSTGTSSQRLQTDGSA1NDNMGNEPARSFRKR...TGEKVEAFEQLEDFSVQSDTDTG

ASPIQ (8) MS0FPADTSSNRPSNSPSPSSIDAGFGSSSGLDLQIGSRHLHFPSSSQPHVNSQGTGFPVNDSTGTSSQRLQTDGSA1NDNMGNEPARSFRKR...TGEKVEAFEQLEDFSVQSDTDTG

AD/E+ASPIQ (11) MS0FPADTSSNRPSNSPSPSSIDAGFGSSSGLDLQIGSRHLHFPSSSQPHVNSQGTGFPVNDSTGTSSQRLQTDGSA1NDNMGNEPARSFRKR...TGEKVEAFEQLEDFSVQSDTDTG

25A MS0FPADTSSNRPSNSPSPSSIDAGFGSSSGLDLQIGSRHLHFPSSSQPHVNSQGTGFPVNDSTGTSSQRLQTDGSA1NDNMGNEPARSFRKR...TGEKVEAFEQLEDFSVQSDTDTG

AP+AQ (8) MS0FPADTSSNRPSNSPSPSSIDAGFGSSSGLDLQIGSRHLHFPSSSQPHVNSQGTGFPVNDSTGTSSQRLQTDGSA1NDNMGNEPARSFRKR...TGEKVEAFEQLEDFSVQSDTDTG

DAF+DAQ+DD/E (16) MS0FPADTSSNRPSNSPSPSSIDAGFGSSSGLDLQIGSRHLHFPSSSQPHVNSQGTGFPVNDSTGTSSQRLQTDGSA1NDNMGNEPARSFRKR...TGEKVEAFEQLEDFSVQSDTDTG

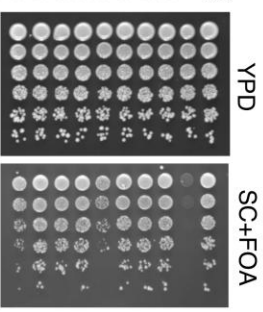

Randell et al., Figure S2, related to Figures 4 and 5

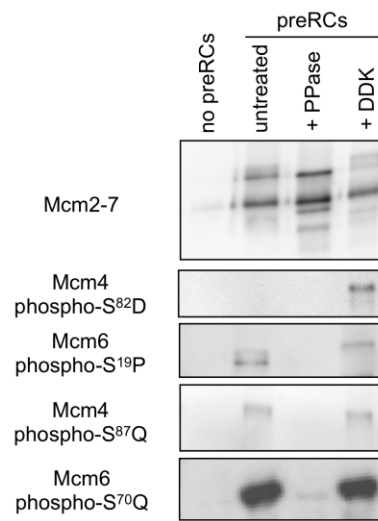

Randell et al., Figure S3, related to Figure 6

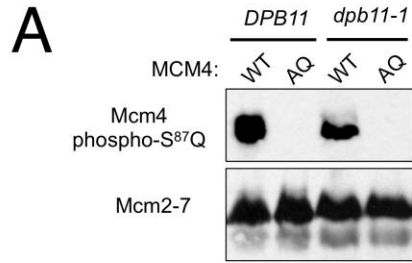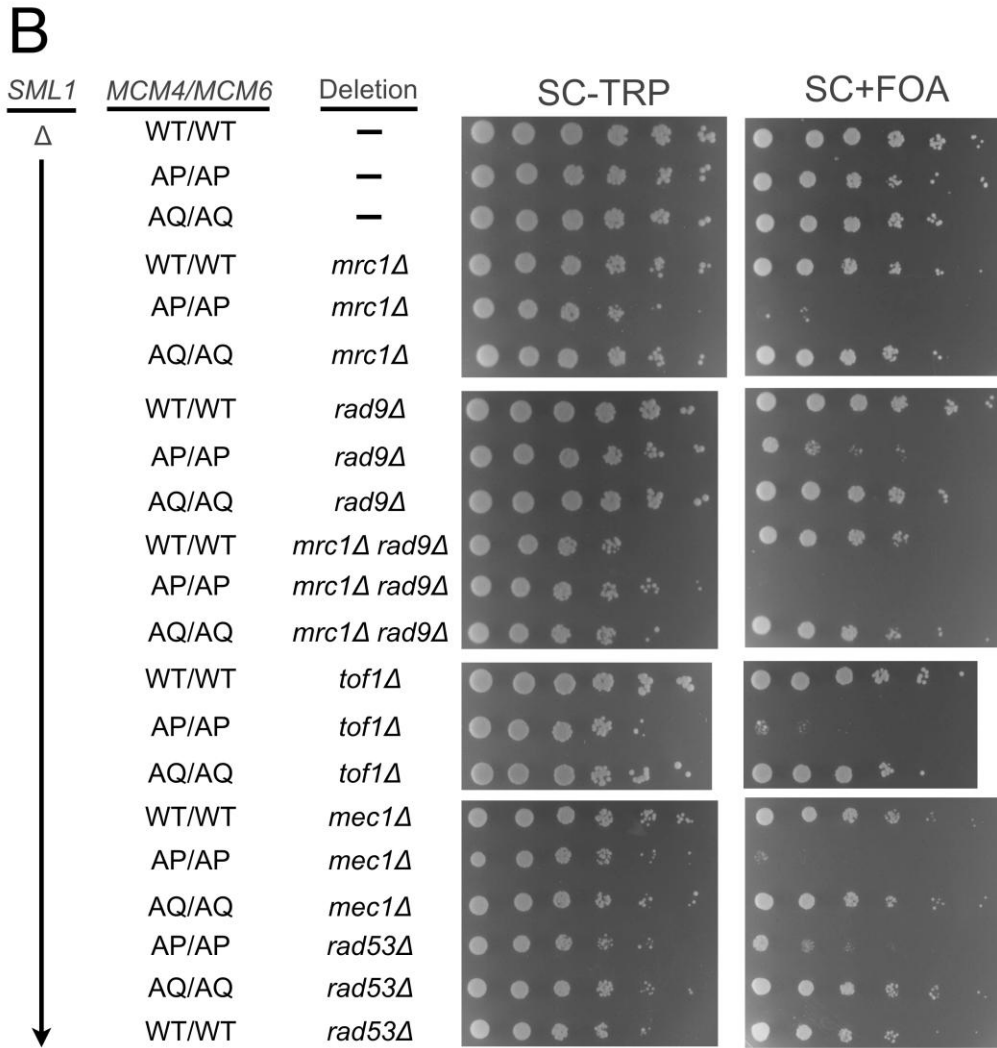

Figure S1. Sequence and Viability of Mutants in *MCM2*, *MCM4*, and *MCM6*, Related to Figure 1

Cells carrying the indicated alleles of *MCM2*, *MCM4*, or *MCM6* on a *TRP1/ARS/CEN* plasmid in addition to a wild-type copy of the same gene on a *URA3/ARS/CEN* plasmid were grown on uracil-containing media for 3-4 generations to allow loss of the *URA3* plasmid carrying the wild-type gene. In each case the endogenous copy of the indicated *MCM* gene was deleted in the tested strain. A five-fold serial dilution of cells was then spotted on plates without (left) or with (right) FOA selection against the *URA3* plasmid. For each gene, the second row is a control including a different *MCM* gene on the *TRP1/ARS/CEN* plasmid that does not complement the deletion.

In addition to the tested mutants, the sequences of several additional mutations that are tested in the manuscript are illustrated here. The number of residues that are mutated in each mutant is indicated in parentheses to the right of each mutant name.

Figure S2. Characterization of Phosphospecific Antibodies, Related to Figures 4 and 5  
Pre-RC assembly was performed in the absence (lane 1) or presence (lanes 2, 3, and 4) of Cdc6. The resulting pre-RCs were treated with lambda phosphatase (lane 3) or DDK (lane 4) and were analyzed with anti-Mcm2-7 sera or phosphospecific antibodies generated against peptides containing the indicated phosphorylated residues. We suspect that the SQ phosphorylation of Mcm2-7 loaded using G1 extracts (Fig. S2) is the result of misregulation of the Mec1 kinase *in vitro* (perhaps due to the presence of linear DNA in the *in vitro* helicase loading assay).

## Figure S3. Interactions between Checkpoint Genes/Proteins Mcm4 and Mcm6

### Phosphorylation, Related to Figure 6

(A) A Dpb11 mutation does not eliminate Mcm4-S87-Q88 phosphorylation. Wild-type (lane 1), *mcm4-AQ* (lane 2), *dpb11-1* or *dpb11-1 mcm4-AQ* strains containing were grown to log phase then arrested in G1 with alpha factor at 25°C. Cells were then shifted to 37°C for 1 hr and then released from alpha factor for 35 min at 37°C followed by whole cell extract preparation. The resulting extracts were analyzed by immunoblotting for Mcm2-7 (top) and Mcm4-S87-Q88 phosphorylation (bottom).

(B) Deletion of *MRC1*, *RAD9*, *TOF1*, *MEC1* or *RAD53* reduces proliferation in the absence of SP but not SQ phosphorylation of Mcm4 and Mcm6. Strains yJCWR200, yJCWR214, yJCWR220, yCC55, yCC58, yCC60, yCC45, yCC48, yCC51, yCC63, yCC68, yCC70, yCC79, yCC80, yCC81, yJCWR224, yJCWR219, and yJCWR222 were analyzed as in Fig. 2A.

### Table S1. Mcm2-7 Phosphopeptides, related to Figure 1

The table shows the Mcm2-7 peptides that were identified as being modified with one or more phosphate. For the first set of phosphopeptides, the site(s) of phosphorylation was unambiguous. For the second set of peptides, the number of phosphates was determined but the sites of phosphorylation were ambiguous. The first column reports the sequence and location of each peptide, the second column indicates the Mcm subunit the peptide is derived from, the third column indicates the phosphorylated residues (unambiguous sites, shown first) or the number of phosphates found on the peptide (ambiguous, shown second) and the last column indicates whether the modification was observed with or without DDK treatment of Mcm2-7.

For the unambiguously identified sites of phosphorylation, the phosphorylated residues are followed by a “#” symbol. Peptides generated by Asp-N instead of trypsin digestion are indicated in bold type. M\* indicates oxidized methionine.

For phosphopeptides for which the site of phosphorylation could not be unambiguously be identified (the last 10 peptides) the serines or threonines colored **red** represent the most likely sites of phosphorylation and the number of phosphorylated residues is indicated.

Table S2. Yeast Strains Used in This Study, related to figures 2-6

The table shows the strain name and genotype of each of the strains used in this study.



Table S1: Phosphorylated Peptides Detected by Mass Spectrometry, Related to Figure 1

| Peptide (sites of phosphorylation are unambiguous) | Subunit | Phosphorylated residue(s)         | DDK dependent? |
|----------------------------------------------------|---------|-----------------------------------|----------------|
| RREEDDS#DSENELPPSSPQQHFR (8-30)                    | Mcm2    | Ser14                             | N              |
| RREEDDS#DS#ENELPPSSPQQHFR (8-30)                   | Mcm2    | Ser14, Ser16                      | N              |
| DRYDPDQVDDREQQELS#LSER (89-109)                    | Mcm2    | Ser105                            | N              |
| YDPDQVDDREQQELS#ER (91-109)                        | Mcm2    | Ser107                            | Y              |
| DRYDPDQVDDREQQELS#ER (89-109)                      | Mcm2    | Ser107                            | Y              |
| QYEDLENS#DDDLLSDM*DIDPLREELTLESLSNVK (157-190)     | Mcm2    | Ser164                            | N              |
| QYEDLENS#DDDLLSDM*DIDPLREELTLESLSNVK (157-190)     | Mcm2    | Ser164, Ser170                    | N              |
| QYEDLENSDDDLLSDM*DIDPLREELTLESLSNVK (157-190)      | Mcm2    | Ser170                            | N              |
| NNGES#AIEQGEDEINEQLNAR (721-741)                   | Mcm2    | Ser725                            | N              |
| SHPENDEDREGEELKNNGES#AIEQGEDEINEQLNAR (706-741)    | Mcm2    | Ser725                            | N              |
| DYT#DATTTTLTR (213-224)                            | Mcm3    | Thr215                            | Y              |
| FALLGEDIGNDIDEEES#EYEEALSK (735-759)               | Mcm3    | Ser751                            | N              |
| RSPQKS#PK (760-767)                                | Mcm3    | Ser765                            | N              |
| SPQKS#PK(762-767)                                  | Mcm3    | Ser765                            | N              |
| QPAS#NSGS#PIK (774-784)                            | Mcm3    | Ser777, Ser781                    | N              |
| VRQPAS#NSGS#PIK (772-784)                          | Mcm3    | Ser777, Ser781                    | N              |
| RST#ASS#VNATPSSAR (789-803)                        | Mcm3    | Thr791, Ser794                    | Y              |
| STASS#VNATPSSAR (790-803)                          | Mcm3    | Ser794                            | N              |
| STASSVNAT#PSS#AR (790-803)                         | Mcm3    | Thr798, Ser801                    | N              |
| FQDDEQNAGEDNDIM*S#PLPADEEAELQR (808-836)           | Mcm3    | Ser824                            | N              |
| LQLGLRVS#PR (838-847)                              | Mcm3    | Ser845                            | N              |
| EHLHAPEEGSSGPLTEVGT#PR (850-870)                   | Mcm3    | Thr868                            | N              |
| NNS#QNLSQGEENIR (50-63)                            | Mcm4    | Ser52                             | N              |
| NNS#QNLS#QGEENIR (50-63)                           | Mcm4    | Ser52, Ser56                      | N              |
| NNSQNLS#QGEENIR (50-63)                            | Mcm4    | Ser56                             | N              |
| AAIGSS#PLNFPSSSQR (64-79)                          | Mcm4    | Ser69                             | N              |
| AAIGSSPLNFPSSSQR (64-79)                           | Mcm4    | Ser77                             | N              |
| QNS#DVFQSQGR (80-90)                               | Mcm4    | Ser82                             | Y              |
| QNSDVFQS#QGR(80-90)                                | Mcm4    | Ser87                             | N              |
| YHS#DLRS#DR (106-114)                              | Mcm4    | Ser108                            | Y              |
| YHSDLRS#DR (106-114)                               | Mcm4    | Ser112                            | Y              |
| ALPTSSSS#LGR (115-125)                             | Mcm4    | Ser122                            | N              |
| NDIHT#S#DLSSPR (136-147)                           | Mcm4    | Thr140, Ser141                    | Y              |
| RNDIHT#S#DLSSPR (135-147)                          | Mcm4    | Thr140, Ser141                    | Y              |
| RNDIHTS#DLSSPR (135-147)                           | Mcm4    | Ser141                            | Y              |
| SGVNTLDTSSSS#APPSEASEPLR (156-178)                 | Mcm4    | Ser167                            | N              |
| SGVNTLDTSSSSAPPS#EASEPLR (156-178)                 | Mcm4    | Ser171                            | Y              |
| <b>DTPSSNRPSNSS#PPSSIGAGFGSSSGL (8-35)</b>         | Mcm6    | Ser19                             | N              |
| <b>DTPSSNRPSNSS#PPSSIGAGFGSSS#GL (8-35)</b>        | Mcm6    | Ser19, Ser33                      | N              |
| <b>DSQIGSRLHFPSSSQPHVNS#QTGPFVN (36-63)</b>        | Mcm6    | Ser56                             | N              |
| <b>DSTQFSS#QRLQT (64-75)</b>                       | Mcm6    | Ser70                             | N              |
| LHFPSSSQPHVNSQTPGFVNDSTQFSS#QR (43-72)             | Mcm6    | Ser70                             | N              |
| LQTDGS#ATNDM*EGNEPAR (73-90)                       | Mcm6    | Ser78                             | N              |
| LQTDGS#ATNDM*EGNEPAR (73-90)                       | Mcm6    | Thr75, Ser78                      | Y              |
| <b>DDDM*NGSS#LPR (220-230)</b>                     | Mcm6    | Ser227                            | N              |
| SEGDEGQADEDEQDDDM*NGSS#LPR (206-230)               | Mcm6    | Ser227                            | N              |
| S#ITTSTSPQTER (249-261)                            | Mcm6    | Ser249                            | N              |
| FTGVEIVPDVT#QLGLPGVKPSSTLDR (397-424)              | Mcm6    | Thr408                            | N              |
| FLQGT#QADDLVSAIQNANHFTELCR (93-119)                | Mcm7    | Thr97                             | N              |
| SLS#PGDIVDVTGIFLPAPYTGFK (342-364)                 | Mcm7    | Ser344                            | N              |
| FVDDGTM*DT#DQEDSLVSTPK (803-822)                   | Mcm7    | Thr811                            | N              |
| FVDDGTM*DT#DQEDSLVST#PK (803-822)                  | Mcm7    | Thr811, Thr820                    | N              |
| FVDDGTM*DTDQEDS#LVST#PK (803-822)                  | Mcm7    | Ser816, Thr820                    | N              |
| FVDDGTM*DTDQEDSLVST#PK (803-822)                   | Mcm7    | Thr820                            | N              |
| Peptide (sites of phosphorylation are ambiguous)   | Subunit | Number of phosphorylated residues | DDK dependent? |
| VRQPASNSGSPIKSTPR (772-788)                        | Mcm3    | 2                                 | Y              |
| VRQPASNSGSPIKSTPR (772-788)                        | Mcm3    | 3                                 | Y              |
| FALLGEDIGNDIDEEESEYEEALSKRSPQKSPK (735-767)        | Mcm3    | 2                                 | Y              |
| AAIGSSPLNFPSSSQR (64-79)                           | Mcm4    | 2                                 | Y              |
| AAIGSSPLNFPSSSQR (64-79)                           | Mcm4    | 3                                 | Y              |
| IRSSASASGR (94-103)                                | Mcm4    | 2                                 | Y              |
| DSQIGSRLHFPSSSQPHVNSQTGPFVN (36-63)                | Mcm6    | 2                                 | N              |
| DSQIGSRLHFPSSSQPHVNSQTGPFVN (36-63)                | Mcm6    | 3                                 | N              |
| LHFPSSSQPHVNSQTGPFVNDSTQFSSQR (43-72)              | Mcm6    | 2                                 | Y              |
| LHFPSSSQPHVNSQTGPFVNDSTQFSSQR (43-72)              | Mcm6    | 3                                 | Y              |

Table S2. Yeast Strains Used in This Study, related to figures 2-6

| Strain   | Genotype                                                                                                                                                                                             | Source                 |
|----------|------------------------------------------------------------------------------------------------------------------------------------------------------------------------------------------------------|------------------------|
| W303BLa  | <i>ade2-1 ura3-1 his3-11,15 trp1-1 leu2-3,112 can1-100 lys2::hisG bar1::hisG MATa</i>                                                                                                                | Lab stock              |
| OAY470   | <i>ade2-1 ura3-1 his3-11,15 trp1-1 leu2-3,112 can1-100 MATa bar1::hisG</i>                                                                                                                           | Aparicio et al. (1997) |
| OAY711   | <i>cdc7-4 his7 ura1 ura3-1 ade2-1 his3-11,15 leu2-3</i>                                                                                                                                              | Gift of O. Aparicio    |
| yJCWR30  | <i>cdc7-4 his7 ura1 ura3-1 ade2-1 his3-11,15 leu2-3 mcm5-bob1</i>                                                                                                                                    | This study             |
| yJCWR150 | <i>ade2-1 ura3-1 his3-11,15 trp1-1 leu2-3,112 can1-100 MATa bar1::hisG cdc7-4 mcm4::natMX4-PMCM5-MCM4[DP+DQ]</i>                                                                                     | This study             |
| yJCWR151 | <i>ade2-1 ura3-1 his3-11,15 trp1-1 leu2-3,112 can1-100 MATa bar1::hisG cdc7-4 mcm4::natMX4-PMCM5-MCM4[D(D/E)]</i>                                                                                    | This study             |
| yJCWR152 | <i>ade2-1 ura3-1 his3-11,15 trp1-1 leu2-3,112 can1-100 MATa bar1::hisG cdc7-4 mcm4::natMX4-PMCM5-MCM4[DS(P/Q)]</i>                                                                                   | This study             |
| yJCWR153 | <i>ade2-1 ura3-1 his3-11,15 trp1-1 leu2-3,112 can1-100 MATa bar1::hisG cdc7-4 mcm4::natMX4-PMCM5-MCM4[D(D/E)+DS(P/Q)]</i>                                                                            | This study             |
| yJCWR185 | <i>MATa ade2-1 ura3-11 his3-11,15 leu2-3,12 can1-100 trp1-1 mcm4Δ::hisG pAS412 (ARS/CEN URA+MCM4-HA/his) pJR121 (ARS/CEN TRP+ MCM4-HA/his) mcm6::LEU2-PMCM5-MCM6</i>                                 | This study             |
| yJCWR176 | <i>MATa ade2-1 ura3-11 his3-11,15 leu2-3,12 can1-100 trp1-1 mcm4Δ::hisG pAS412 (ARS/CEN URA+MCM4-HA/his) pJR139 (ARS/CEN TRP+ mcm4-HA/his[A(D/E)]) mcm6::LEU2-PMCM5-mcm6[A(D/E)]</i>                 | This study             |
| yJCWR180 | <i>MATa ade2-1 ura3-11 his3-11,15 leu2-3,12 can1-100 trp1-1 mcm4Δ::hisG pAS412 (ARS/CEN URA+MCM4-HA/his) pJR189 (ARS/CEN TRP+ mcm4-HA/his[AS(P/Q)]) mcm6::LEU2-PMCM5-mcm6[AS(P/Q)]</i>               | This study             |
| yJCWR184 | <i>MATa ade2-1 ura3-11 his3-11,15 leu2-3,12 can1-100 trp1-1 mcm4Δ::hisG pAS412 (ARS/CEN URA+MCM4-HA/his) pJR140 (ARS/CEN TRP+ mcm4-HA/his[A(D/E)+AS(P/Q)]) mcm6::LEU2-PMCM5-mcm6[A(D/E)+AS(P/Q)]</i> | This study             |
| yJCWR167 | <i>MATa ade2-1 ura3-11 his3-11,15 leu2-3,12 can1-100 trp1-1 mcm4Δ::hisG pAS412 (ARS/CEN URA+MCM4-HA/his) pJR136 (ARS/CEN TRP+ mcm4-HA/his[AP]) mcm6::LEU2-PMCM5-mcm6[AP]</i>                         | This study             |
| yJCWR171 | <i>MATa ade2-1 ura3-11 his3-11,15 leu2-3,12 can1-100 trp1-1 mcm4Δ::hisG pAS412 (ARS/CEN URA+MCM4-HA/his) pJR137 (ARS/CEN TRP+ mcm4-HA/his[AQ]) mcm6::LEU2-PMCM5-mcm6[AQ]</i>                         | This study             |
| yJCWR175 | <i>MATa ade2-1 ura3-11 his3-11,15 leu2-3,12 can1-100 trp1-1 mcm4Δ::hisG pAS412 (ARS/CEN URA+MCM4-HA/his) pJR138 (ARS/CEN TRP+ mcm4-HA/his[AP+AQ]) mcm6::LEU2-PMCM5-mcm6[AP+AQ]</i>                   | This study             |

|          |                                                                                                                                                                                                      |                      |
|----------|------------------------------------------------------------------------------------------------------------------------------------------------------------------------------------------------------|----------------------|
| yJCWR236 | <i>MATa ade2-1 ura3-11 his3-11,15 leu2-3,12 can1-100 trp1-1 mcm4Δ::hisG pAS412 (ARS/CEN URA+MCM4-HA/his) pJR194 (ARS/CEN TRP+ mcm4-HA/his[DA(P/Q)+D(D/E)]) mcm6::LEU2-PMCM5-mcm6[AP+AQ]</i>          | This study           |
| yJCWR237 | <i>MATa ade2-1 ura3-11 his3-11,15 leu2-3,12 can1-100 trp1-1 mcm4Δ::hisG pAS412 (ARS/CEN URA+MCM4-HA/his) pJR194 (ARS/CEN TRP+ mcm4-HA/his[DA(P/Q)+D(D/E)]) mcm6::LEU2-PMCM5-mcm6[DA(P/Q)+D(D/E)]</i> | This study           |
| yJCWR128 | <i>MATa ade2-1 ura3-11 his3-11,15 leu2-3,12 can1-100 trp1-1 lys2Δ::hisG bar1Δ::hisG pep4Δ::KanMX4 mcm6Δ::HisMX6 pAS438 (TRP+MCM6-HA/his)</i>                                                         | This study           |
| yJCWR129 | <i>MATa ade2-1 ura3-11 his3-11,15 leu2-3,12 can1-100 trp1-1 lys2Δ::hisG bar1Δ::hisG pep4Δ::KanMX4 mcm6Δ::HisMX6 pJR143 (TRP+mcm6-HA/his[AP])</i>                                                     | This study           |
| yJCWR130 | <i>MATa ade2-1 ura3-11 his3-11,15 leu2-3,12 can1-100 trp1-1 lys2Δ::hisG bar1Δ::hisG pep4Δ::KanMX4 mcm6Δ::HisMX6 pJR144 (TRP+mcm6-HA/his[SQ])</i>                                                     | This study           |
| yJCWR135 | <i>MATa ade2-1 ura3-11 his3-11,15 leu2-3,12 can1-100 trp1-1 lys2Δ::hisG bar1Δ::hisG pep4Δ::KanMX4 mcm6Δ::HisMX6 pJR149 (TRP+mcm6-HA/his[A(D/E)+AS(P/Q)])</i>                                         | This study           |
| ySC15    | <i>MATa ade2-1 ura3-11 his3-11,15 can1-100 trp1-1 lys2::hisG bar1::hisG orc1::hisG leu2::ORC1 trp1::p404-GAL1-10-ORC3,4 lys2::pys2-GAL1-10-ORC2,5 his3::p403-GAL1-10-ORC1,6 pep4::KanMX</i>          | Bowers et al. (2004) |
| yJCWR200 | <i>MATa ade2-1 ura3-11 his3-11,15 leu2-3,12 can1-100 trp1-1 mcm4Δ::hisG pAS412 (ARS/CEN URA+MCM4-HA/his) pJR121 (ARS/CEN TRP+ MCM4-HA/his) mcm6::LEU2-PMCM5-MCM6 sml1Δ::His3MX6</i>                  | This study           |
| yJCWR205 | <i>MATa ade2-1 ura3-11 his3-11,15 leu2-3,12 can1-100 trp1-1 mcm4::hisG pJR121 (ARS/CEN TRP+MCM4-HA/his) mcm6::LEU2-PMCM5-MCM6</i>                                                                    | This study           |
| yJCWR206 | <i>MATa ade2-1 ura3-11 his3-11,15 leu2-3,12 can1-100 trp1-1 mcm4::hisG pJR136 (ARS/CEN TRP+mcm4-HA/his[AP]) mcm6::LEU2-PMCM5-mcm6[AP]</i>                                                            | This study           |
| yJCWR207 | <i>MATa ade2-1 ura3-11 his3-11,15 leu2-3,12 can1-100 trp1-1 mcm4::hisG pJR137 (ARS/CEN TRP+mcm4-HA/his[AQ]) mcm6::LEU2-PMCM5-mcm6[AQ]</i>                                                            | This study           |
| yJCWR208 | <i>MATa ade2-1 ura3-11 his3-11,15 leu2-3,12 can1-100 trp1-1 mcm4::hisG pJR138 (ARS/CEN TRP+mcm4-HA/his[AP+AQ]) mcm6::LEU2-PMCM5-mcm6[AP+AQ]</i>                                                      | This study           |
| yJCWR220 | <i>MATa ade2-1 ura3-11 his3-11,15 leu2-3,12 can1-100 trp1-1 mcm4::hisG pAS412 (ARS/CEN URA+MCM4-HA/his) pJR137 (ARS/CEN TRP+ mcm4-HA/his[AQ]) mcm6::LEU2-PMCM5-mcm6[AQ] sml1Δ::His3MX6</i>           | This study           |

|          |                                                                                                                                                                                                                                      |            |
|----------|--------------------------------------------------------------------------------------------------------------------------------------------------------------------------------------------------------------------------------------|------------|
| yRH109   | <i>MATa ade2-1 ura3-11 his3-11,15 can1-100 trp1-1 lys2::hisG bar1::HisG orc1::HisG leu2::ORC1 trp1::p404-GAL1-10-ORC3,4 lys2::plys2-GAL1-10-ORC2,5 his3::p403-GAL1-10-ORC1,6 pep4::KanMX Mcm10-13myc::natMX4 sml1::MX3</i>           | This study |
| yRH110   | <i>MATa ade2-1 ura3-11 his3-11,15 can1-100 trp1-1 lys2::hisG bar1::HisG orc1::HisG leu2::ORC1 trp1::p404-GAL1-10-ORC3,4 lys2::plys2-GAL1-10-ORC2,5 his3::p403-GAL1-10-ORC1,6 pep4::KanMX Mcm10-13myc::natMX4 sml1::MX3 mec1::MX3</i> | This study |
| yJCWR78  | <i>MATa ade2-1 ura3-1 his3-11,15 can1-100 bar1::HisG orc1::HisG leu2::ORC1 trp1::p404-GAL1-10-ORC3,4 lys2::plys2-GAL1-10-ORC2,5 his3::p403-GAL1-10-ORC1,6 pep4::KanMX Mcm10-13myc::natMX4 sml1::MX3 tel1::MX3</i>                    | This study |
| yJCWR79  | <i>MATa ade2-1 ura3-1 his3-11,15 can1-100 bar1::HisG orc1::HisG leu2::ORC1 trp1::p404-GAL1-10-ORC3,4 lys2::plys2-GAL1-10-ORC2,5 his3::p403-GAL1-10-ORC1,6 pep4::KanMX Mcm10-13myc::natMX4 sml1::MX3 mec1::MX3 tel1::MX3</i>          | This study |
| yJCWR214 | <i>MATa ade2-1 ura3-11 his3-11,15 leu2-3,12 can1-100 trp1-1 mcm4::hisG pAS412 (ARS/CEN URA+ MCM4-HA/his) pJR136 (ARS/CEN TRP+ mcm4-HA/his[AP]) mcm6::LEU2-PMCM5-mcm6[AP] sml1Δ::His3MX6</i>                                          | This study |
| yJCWR216 | <i>MATa ade2-1 ura3-11 his3-11,15 leu2-3,12 can1-100 trp1-1 mcm4::hisG pAS412 (ARS/CEN URA+ MCM4-HA/his) pJR136 (ARS/CEN TRP+ mcm4-HA/his[AP]) mcm6::LEU2-PMCM5-mcm6[AP] sml1Δ::His3MX6 mec1Δ::KanMX</i>                             | This study |
| yJCWR217 | <i>MATa ade2-1 ura3-11 his3-11,15 leu2-3,12 can1-100 trp1-1 mcm4::hisG pAS412 (ARS/CEN URA+ MCM4-HA/his) pJR136 (ARS/CEN TRP+ mcm4-HA/his[AP]) mcm6::LEU2-PMCM5-mcm6[AP] sml1Δ::His3MX6 tel1Δ::natMX4</i>                            | This study |
| yJCWR218 | <i>MATa ade2-1 ura3-11 his3-11,15 leu2-3,12 can1-100 trp1-1 mcm4::hisG pAS412 (ARS/CEN URA+ MCM4-HA/his) pJR136 (ARS/CEN TRP+ mcm4-HA/his[AP]) mcm6::LEU2-PMCM5-mcm6[AP] sml1Δ::His3MX6 mec1Δ::kanMX tel1Δ::natMX4</i>               | This study |
| yJCWR221 | <i>MATa ade2-1 ura3-11 his3-11,15 leu2-3,12 can1-100 trp1-1 mcm4Δ::hisG pAS412 (ARS/CEN URA+ MCM4-HA/his) pJR137 (ARS/CEN TRP+ mcm4-HA/his[AQ]) mcm6::LEU2-PMCM5-mcm6[AQ] sml1Δ::His3MX6 mec1Δ::kanMX</i>                            | This study |
| yJCWR223 | <i>MATa ade2-1 ura3-11 his3-11,15 leu2-3,12 can1-100 trp1-1 mcm4Δ::hisG pAS412 (ARS/CEN URA+ MCM4-HA/his) pJR121 (ARS/CEN TRP+ MCM4-HA/his) mcm6::LEU2-PMCM5-MCM6 sml1Δ::His3MX6 mec1Δ::kanMX</i>                                    | This study |
| yJCWR80  | <i>MATa ade2-1 ura3-11 his3-11,15 leu2-3,12 can1-100 trp1-1 mcm2::hisG pAS404 (ARS/CEN URA+ MCM2) pJR120 (ARS/CEN TRP+ MCM2)</i>                                                                                                     | This study |

|         |                                                                                                                                                               |            |
|---------|---------------------------------------------------------------------------------------------------------------------------------------------------------------|------------|
| yJCWR81 | <i>MATa ade2-1 ura3-11 his3-11,15 leu2-3,12 can1-100 trp1-1 mcm2::hisG pAS404 (ARS/CEN URA+MCM2) pJR121 (ARS/CEN TRP+ MCM4)</i>                               | This study |
| yJCWR82 | <i>MATa ade2-1 ura3-11 his3-11,15 leu2-3,12 can1-100 trp1-1 mcm2::hisG pAS404 (ARS/CEN URA+MCM2) pJR130 (ARS/CEN TRP+ mcm2[AP3])</i>                          | This study |
| yJCWR83 | <i>MATa ade2-1 ura3-11 his3-11,15 leu2-3,12 can1-100 trp1-1 mcm2::hisG pAS404 (ARS/CEN URA+MCM2) pJR131 (ARS/CEN TRP+ mcm2[SP3+SQ1])</i>                      | This study |
| yJCWR84 | <i>MATa ade2-1 ura3-11 his3-11,15 leu2-3,12 can1-100 trp1-1 mcm2::hisG pAS404 (ARS/CEN URA+MCM2) pJR132 (ARS/CEN TRP+ mcm2[CK2-4])</i>                        | This study |
| yJCWR85 | <i>MATa ade2-1 ura3-11 his3-11,15 leu2-3,12 can1-100 trp1-1 mcm2::hisG pAS404 (ARS/CEN URA+MCM2) pJR133 (ARS/CEN TRP+ mcm2[DDK4])</i>                         | This study |
| yJCWR86 | <i>MATa ade2-1 ura3-11 his3-11,15 leu2-3,12 can1-100 trp1-1 mcm2::hisG pAS404 (ARS/CEN URA+MCM2) pJR134 (ARS/CEN TRP+ mcm2[DDK4+SXP2])</i>                    | This study |
| yJCWR87 | <i>MATa ade2-1 ura3-11 his3-11,15 leu2-3,12 can1-100 trp1-1 mcm2::hisG pAS404 (ARS/CEN URA+MCM2) pJR135 (ARS/CEN TRP+ mcm2-13A)</i>                           | This study |
| yJCWR88 | <i>MATa ade2-1 ura3-11 his3-11,15 leu2-3,12 can1-100 trp1-1 mcm4::hisG pAS412 (ARS/CEN URA+MCM4-HA/his) pJR121 (ARS/CEN TRP+ MCM4-HA/his)</i>                 | This study |
| yJCWR89 | <i>MATa ade2-1 ura3-11 his3-11,15 leu2-3,12 can1-100 trp1-1 mcm4::hisG pAS412 (ARS/CEN URA+MCM4-HA/his) pAS438 (ARS/CEN TRP+MCM6-HA/his)</i>                  | This study |
| yJCWR90 | <i>MATa ade2-1 ura3-11 his3-11,15 leu2-3,12 can1-100 trp1-1 mcm4::hisG pAS412 (ARS/CEN URA+MCM4-HA/his) pJR136 (ARS/CEN TRP+ mcm4-HA/his[AP])</i>             | This study |
| yJCWR91 | <i>MATa ade2-1 ura3-11 his3-11,15 leu2-3,12 can1-100 trp1-1 mcm4::hisG pAS412 (ARS/CEN URA+MCM4-HA/his) pJR137 (ARS/CEN TRP+ mcm4-HA/his[AQ])</i>             | This study |
| yJCWR92 | <i>MATa ade2-1 ura3-11 his3-11,15 leu2-3,12 can1-100 trp1-1 mcm4::hisG pAS412 (ARS/CEN URA+MCM4-HA/his) pJR138 (ARS/CEN TRP+ mcm4-HA/his[AP+AQ])</i>          | This study |
| yJCWR93 | <i>MATa ade2-1 ura3-11 his3-11,15 leu2-3,12 can1-100 trp1-1 mcm4::hisG pAS412 (ARS/CEN URA+MCM4-HA/his) pJR139 (ARS/CEN TRP+ mcm4-HA/his[A(D/E)])</i>         | This study |
| yJCWR94 | <i>MATa ade2-1 ura3-11 his3-11,15 leu2-3,12 can1-100 trp1-1 mcm4::hisG pAS412 (ARS/CEN URA+MCM4-HA/his) pJR140 (ARS/CEN TRP+ mcm4-HA/his[A(D/E)+AS(P/Q)])</i> | This study |
| yJCWR95 | <i>MATa ade2-1 ura3-11 his3-11,15 leu2-3,12 can1-100 trp1-1 mcm4::hisG pAS412 (ARS/CEN URA+MCM4-HA/his) pJR141 (ARS/CEN TRP+ mcm4-HA/his[25A])</i>            | This study |

|          |                                                                                                                                                                                                       |            |
|----------|-------------------------------------------------------------------------------------------------------------------------------------------------------------------------------------------------------|------------|
| yJCWR96  | <i>MATa ade2-1 ura3-11 his3-11,15 leu2-3,12 can1-100 trp1-1 mcm4::hisG pAS412 (ARS/CEN URA+ MCM4-HA/his) pJR142 (ARS/CEN TRP+ mcm4-HA/his[43A])</i>                                                   | This study |
| yJCWR97  | <i>MATa ade2-1 ura3-11 his3-11,15 leu2-3,12 can1-100 trp1-1 lys2::hisG bar1::hisG pep4::KanMX mcm6Δ::HisMX6 pAS452 (ARS/CEN URA+ MCM6-HA/his) pAS438 (ARS/CEN TRP+ MCM6-HA/his)</i>                   | This study |
| yJCWR98  | <i>MATa ade2-1 ura3-11 his3-11,15 leu2-3,12 can1-100 trp1-1 lys2::hisG bar1::hisG pep4::KanMX mcm6Δ::HisMX6 pAS452 (ARS/CEN URA+ MCM6-HA/his) pJR120 (ARS/CEN TRP+ MCM2)</i>                          | This study |
| yJCWR99  | <i>MATa ade2-1 ura3-11 his3-11,15 leu2-3,12 can1-100 trp1-1 lys2::hisG bar1::hisG pep4::KanMX mcm6Δ::HisMX6 pAS452 (ARS/CEN URA+ MCM6-HA/his) pJR143 (ARS/CEN TRP+ mcm6-HA/his[AP])</i>               | This study |
| yJCWR100 | <i>MATa ade2-1 ura3-11 his3-11,15 leu2-3,12 can1-100 trp1-1 lys2::hisG bar1::hisG pep4::KanMX mcm6Δ::HisMX6 pAS452 (ARS/CEN URA+ MCM6-HA/his) pJR144 (ARS/CEN TRP+ mcm6-HA/his[AQ])</i>               | This study |
| yJCWR101 | <i>MATa ade2-1 ura3-11 his3-11,15 leu2-3,12 can1-100 trp1-1 lys2::hisG bar1::hisG pep4::KanMX mcm6Δ::HisMX6 pAS452 (ARS/CEN URA+ MCM6-HA/his) pJR145 (ARS/CEN TRP+ mcm6-HA/his[AQ5+AA4+8])</i>        | This study |
| yJCWR102 | <i>MATa ade2-1 ura3-11 his3-11,15 leu2-3,12 can1-100 trp1-1 lys2::hisG bar1::hisG pep4::KanMX mcm6Δ::HisMX6 pAS452 (ARS/CEN URA+ MCM6-HA/his) pJR145 (ARS/CEN TRP+ mcm6-HA/his[AP3+AQ5+AA4+10])</i>   | This study |
| yJCWR103 | <i>MATa ade2-1 ura3-11 his3-11,15 leu2-3,12 can1-100 trp1-1 lys2::hisG bar1::hisG pep4::KanMX mcm6Δ::HisMX6 pAS452 (ARS/CEN URA+ MCM6-HA/his) pJR147 (ARS/CEN TRP+ mcm6-HA/his[A(D/E)3])</i>          | This study |
| yJCWR104 | <i>MATa ade2-1 ura3-11 his3-11,15 leu2-3,12 can1-100 trp1-1 lys2::hisG bar1::hisG pep4::KanMX mcm6Δ::HisMX6 pAS452 (ARS/CEN URA+ MCM6-HA/his) pJR148 (ARS/CEN TRP+ mcm6-HA/his[AS(P/Q)8])</i>         | This study |
| yJCWR105 | <i>MATa ade2-1 ura3-11 his3-11,15 leu2-3,12 can1-100 trp1-1 lys2::hisG bar1::hisG pep4::KanMX mcm6Δ::HisMX6 pAS452 (ARS/CEN URA+ MCM6-HA/his) pJR149 (ARS/CEN TRP+ mcm6-HA/his[A(D/E)3+AS(P/Q)8])</i> | This study |
| yJCWR106 | <i>MATa ade2-1 ura3-11 his3-11,15 leu2-3,12 can1-100 trp1-1 lys2::hisG bar1::hisG pep4::KanMX mcm6Δ::HisMX6 pAS452 (ARS/CEN URA+ MCM6-HA/his) pJR150 (ARS/CEN TRP+ mcm6-HA/his[25A])</i>              | This study |

|       |                                                                                                                                                                                                                        |            |
|-------|------------------------------------------------------------------------------------------------------------------------------------------------------------------------------------------------------------------------|------------|
| yCC45 | <i>MATa ade2-1 ura3-11 his3-11,15 leu2-3,12 can1-100 trp1-1 mcm4Δ::hisG pAS412 (ARS/CEN URA+ MCM4-HA/his) pJR121 (ARS/CEN TRP+ MCM4-HA/his) mcm6::LEU2-PMCM5-MCM6 sm11Δ::His3MX6 rad9Δ::natMX4</i>                     | This study |
| yCC48 | <i>MATa ade2-1 ura3-11 his3-11,15 leu2-3,12 can1-100 trp1-1 mcm4::hisG pAS412 (ARS/CEN URA+ MCM4-HA/his) pJR136 (ARS/CEN TRP+ mcm4-HA/his[AP]) mcm6::LEU2-PMCM5-mcm6[AP] sm11Δ::His3MX6 rad9Δ::natMX4</i>              | This study |
| yCC51 | <i>MATa ade2-1 ura3-11 his3-11,15 leu2-3,12 can1-100 trp1-1 mcm4::hisG pAS412 (ARS/CEN URA+ MCM4-HA/his) pJR137 (ARS/CEN TRP+ mcm4-HA/his[AQ]) mcm6::LEU2-PMCM5-mcm6[AQ] sm11Δ::His3MX6 rad9Δ::natMX4</i>              | This study |
| yCC55 | <i>MATa ade2-1 ura3-11 his3-11,15 leu2-3,12 can1-100 trp1-1 mcm4Δ::hisG pAS412 (ARS/CEN URA+ MCM4-HA/his) pJR121 (ARS/CEN TRP+ MCM4-HA/his) mcm6::LEU2-PMCM5-MCM6 sm11Δ::His3MX6 mrc1Δ::KanMX</i>                      | This study |
| yCC58 | <i>MATa ade2-1 ura3-11 his3-11,15 leu2-3,12 can1-100 trp1-1 mcm4::hisG pAS412 (ARS/CEN URA+ MCM4-HA/his) pJR136 (ARS/CEN TRP+ mcm4-HA/his[AP]) mcm6::LEU2-PMCM5-mcm6[AP] sm11Δ::His3MX6 mrc1Δ::KanMX</i>               | This study |
| yCC60 | <i>MATa ade2-1 ura3-11 his3-11,15 leu2-3,12 can1-100 trp1-1 mcm4::hisG pAS412 (ARS/CEN URA+ MCM4-HA/his) pJR137 (ARS/CEN TRP+ mcm4-HA/his[AQ]) mcm6::LEU2-PMCM5-mcm6[AQ] sm11Δ::His3MX6 mrc1Δ::KanMX</i>               | This study |
| yCC63 | <i>MATa ade2-1 ura3-11 his3-11,15 leu2-3,12 can1-100 trp1-1 mcm4Δ::hisG pAS412 (ARS/CEN URA+ MCM4-HA/his) pJR121 (ARS/CEN TRP+ MCM4-HA/his) mcm6::LEU2-PMCM5-MCM6 sm11Δ::His3MX6 rad9Δ::natMX4 mrc1Δ::KanMX</i>        | This study |
| yCC68 | <i>MATa ade2-1 ura3-11 his3-11,15 leu2-3,12 can1-100 trp1-1 mcm4::hisG pAS412 (ARS/CEN URA+ MCM4-HA/his) pJR136 (ARS/CEN TRP+ mcm4-HA/his[AP]) mcm6::LEU2-PMCM5-mcm6[AP] sm11Δ::His3MX6 rad9Δ::natMX4 mrc1Δ::KanMX</i> | This study |
| yCC70 | <i>MATa ade2-1 ura3-11 his3-11,15 leu2-3,12 can1-100 trp1-1 mcm4::hisG pAS412 (ARS/CEN URA+ MCM4-HA/his) pJR137 (ARS/CEN TRP+ mcm4-HA/his[AQ]) mcm6::LEU2-PMCM5-mcm6[AQ] sm11Δ::His3MX6 rad9Δ::natMX4 mrc1Δ::KanMX</i> | This study |
| yCC73 | <i>MATa ade2-1 ura3-11 his3-11,15 leu2-3,12 can1-100 trp1-1 mcm4Δ::hisG pAS412 (ARS/CEN URA+ MCM4-HA/his) pJR138 (ARS/CEN TRP+ mcm4-HA/his[AP+AQ]) mcm6::LEU2-PMCM5-mcm6[AP+AQ] mrc1Δ::natMX4</i>                      | This study |

|        |                                                                                                                                                                                                                          |            |
|--------|--------------------------------------------------------------------------------------------------------------------------------------------------------------------------------------------------------------------------|------------|
| yCC75  | <i>MATa ade2-1 ura3-11 his3-11,15 leu2-3,12 can1-100 trp1-1 mcm4Δ::hisG pAS412 (ARS/CEN URA+MCM4-HA/his) pJR194 (ARS/CEN TRP+ mcm4-HA/his[DA(P/Q)+D(D/E)]) mcm6::LEU2-PMCM5-mcm6[AP+AQ] mrc1Δ::natMX4</i>                | This study |
| yCC77  | <i>MATa ade2-1 ura3-11 his3-11,15 leu2-3,12 can1-100 trp1-1 mcm4Δ::hisG pAS412 (ARS/CEN URA+MCM4-HA/his) pJR194 (ARS/CEN TRP+ mcm4-HA/his[DA(P/Q)+D(D/E)]) mcm6::LEU2-PMCM5-mcm6[DA(P/Q)+D(D/E)] mrc1Δ::natMX4</i>       | This study |
| yCC79  | <i>MATa ade2-1 ura3-11 his3-11,15 leu2-3,12 can1-100 trp1-1 mcm4Δ::hisG pAS412 (ARS/CEN URA+MCM4-HA/his) pJR121 (ARS/CEN TRP+ MCM4-HA/his) mcm6::LEU2-PMCM5-MCM6 sml1Δ::His3MX6 tof1Δ::KanMX</i>                         | This study |
| yCC80  | <i>MATa ade2-1 ura3-11 his3-11,15 leu2-3,12 can1-100 trp1-1 mcm4::hisG pAS412 (ARS/CEN URA+MCM4-HA/his) pJR136 (ARS/CEN TRP+ mcm4-HA/his[AP]) mcm6::LEU2-PMCM5-mcm6[AP] sml1Δ::His3MX6 tof1Δ::KanMX</i>                  | This study |
| yCC81  | <i>MATa ade2-1 ura3-11 his3-11,15 leu2-3,12 can1-100 trp1-1 mcm4::hisG pAS412 (ARS/CEN URA+MCM4-HA/his) pJR137 (ARS/CEN TRP+ mcm4-HA/his[AQ]) mcm6::LEU2-PMCM5-mcm6[AQ] sml1Δ::His3MX6 tof1Δ::KanMX</i>                  | This study |
| yCC29  | <i>ade2-1 trp1-1 leu2-3,112 his3-11,15 ura3-1 can1-100 Delta-bar1 lys2::HisG pep4::KanMX mcm4::natMX4MX4-PMCM5-mcm4[AQ] mcm6::LEU2-PMCM5-mcm6[AQ]</i>                                                                    | This study |
| yCC98  | <i>MATa ade2-1 ura3-11 his3-11,15 leu2-3,12 can1-100 trp1-1 mcm4Δ::hisG pJR121 (ARS/CEN TRP+MCM4-HA/his) mcm6::LEU2-PMCM5-MCM6 sml1Δ::His3MX6 mrc1Δ::KanMX</i>                                                           | This study |
| yCC100 | <i>MATa ade2-1 ura3-11 his3-11,15 leu2-3,12 can1-100 trp1-1 mcm4Δ::hisG pJR137 (ARS/CEN TRP+ mcm4-HA/his[AQ]) mcm6::LEU2-PMCM5-mcm6[AQ] sml1Δ::His3MX6 mrc1Δ::KanMX</i>                                                  | This study |
| yCC90  | <i>MATa ade2-1 ura3-11 his3-11,15 leu2-3,12 can1-100 trp1-1 mcm4Δ::hisG pAS412 (ARS/CEN URA+MCM4-HA/his) pJR138 (ARS/CEN TRP+ mcm4-HA/his[AP+AQ]) mcm6::LEU2-PMCM5-mcm6[AP+AQ] sml1Δ::His3MX6 mec1Δ::natMX4</i>          | This study |
| yCC94  | <i>MATa ade2-1 ura3-11 his3-11,15 leu2-3,12 can1-100 trp1-1 mcm4Δ::hisG pAS412 (ARS/CEN URA+MCM4-HA/his) pJR194 (ARS/CEN TRP+ mcm4-HA/his[DA(P/Q)+D(D/E)]) mcm6::LEU2-PMCM5-mcm6[AP+AQ] sml1Δ::His3MX6 mec1Δ::natMX4</i> | This study |



|          |                                                                                                                                                                                                                                    |            |
|----------|------------------------------------------------------------------------------------------------------------------------------------------------------------------------------------------------------------------------------------|------------|
| yCC95    | <i>MATa ade2-1 ura3-11 his3-11,15 leu2-3,12 can1-100 trp1-1 mcm4Δ::hisG pAS412 (ARS/CEN URA+MCM4-HA/his) pJR194 (ARS/CEN TRP+ mcm4-HA/his[DA(P/Q)+D(D/E)]) mcm6::LEU2-PMCM5-mcm6[DA(P/Q)+D(D/E)] sml1Δ::His3MX6 mec1Δ::natMX4</i>  | This study |
| yJCWR224 | <i>MATa ade2-1 ura3-11 his3-11,15 leu2-3,12 can1-100 trp1-1 mcm4Δ::hisG pAS412 (ARS/CEN URA+MCM4-HA/his) pJR121 (ARS/CEN TRP+ MCM4-HA/his) mcm6::LEU2-PMCM5-MCM6 sml1Δ::His3MX6 rad53Δ::kanMX</i>                                  | This study |
| yJCWR219 | <i>MATa ade2-1 ura3-11 his3-11,15 leu2-3,12 can1-100 trp1-1 mcm4::hisG pAS412 (ARS/CEN URA+MCM4-HA/his) pJR136 (ARS/CEN TRP+ mcm4-HA/his[AP]) mcm6::LEU2-PMCM5-mcm6[AP] sml1Δ::His3MX6 rad53Δ::kanMX</i>                           | This study |
| yJCWR222 | <i>MATa ade2-1 ura3-11 his3-11,15 leu2-3,12 can1-100 trp1-1 mcm4::hisG pAS412 (ARS/CEN URA+MCM4-HA/his) pJR137 (ARS/CEN TRP+ mcm4-HA/his[AQ]) mcm6::LEU2-PMCM5-mcm6[AQ] sml1Δ::His3MX6 rad53Δ::kanMX</i>                           | This study |
| yCC114   | <i>MATa ade2-1 ura3-11 his3-11,15 leu2-3,12 can1-100 trp1-1 mcm4Δ::hisG pAS412 (ARS/CEN URA+MCM4-HA/his) pJR138 (ARS/CEN TRP+ mcm4-HA/his[AP+AQ]) mcm6::LEU2-PMCM5-mcm6[AP+AQ] sml1Δ::His3MX6 rad53Δ::natMX4</i>                   | This study |
| yCC116   | <i>MATa ade2-1 ura3-11 his3-11,15 leu2-3,12 can1-100 trp1-1 mcm4Δ::hisG pAS412 (ARS/CEN URA+MCM4-HA/his) pJR194 (ARS/CEN TRP+ mcm4-HA/his[DA(P/Q)+D(D/E)]) mcm6::LEU2-PMCM5-mcm6[AP+AQ] sml1Δ::His3MX6 rad53Δ::natMX4</i>          | This study |
| yCC117   | <i>MATa ade2-1 ura3-11 his3-11,15 leu2-3,12 can1-100 trp1-1 mcm4Δ::hisG pAS412 (ARS/CEN URA+MCM4-HA/his) pJR194 (ARS/CEN TRP+ mcm4-HA/his[DA(P/Q)+D(D/E)]) mcm6::LEU2-PMCM5-mcm6[DA(P/Q)+D(D/E)] sml1Δ::His3MX6 rad53Δ::natMX4</i> | This study |
